# Supplementary material for: Gene and Blood Analysis Reveal That Transfer from Brackish Water to Freshwater Is More Stressful to the Silverside Odontesthes humensis
Source: PubMed Central journal article supplement (PMC5836595; doi:10.3389/fgene.2018.00028), 2018-02-06
Supplement: Table_1.pdf [file Table_1.pdf]

**Supplementary Table 1:** Expression of reference genes of *Odontesthes humensis* before (D0) and after (D1, D7 and D15) hypo and hyperosmotic shock. Equal letters represent no difference in a same column.

| Treatment      | Time points | Ct values of reference genes      |                                   |
|----------------|-------------|-----------------------------------|-----------------------------------|
|                |             | <i>actb</i>                       | <i>h3a</i>                        |
| FW-BW transfer | D0          | 24.90 ( $\pm 0.69$ ) <sup>a</sup> | 20.43 ( $\pm 0.77$ ) <sup>a</sup> |
|                | D1          | 24.56 ( $\pm 0.55$ ) <sup>a</sup> | 20.32 ( $\pm 0.49$ ) <sup>a</sup> |
|                | D7          | 24.53 ( $\pm 0.77$ ) <sup>a</sup> | 20.02 ( $\pm 0.68$ ) <sup>a</sup> |
|                | D15         | 24.55 ( $\pm 0.74$ ) <sup>a</sup> | 20.00 ( $\pm 0.71$ ) <sup>a</sup> |
| BW-FW transfer | D0          | 24.53 ( $\pm 0.90$ ) <sup>a</sup> | 20.51 ( $\pm 1.05$ ) <sup>a</sup> |
|                | D1          | 24.25 ( $\pm 0.59$ ) <sup>a</sup> | 20.36 ( $\pm 0.52$ ) <sup>a</sup> |
|                | D7          | 24.98 ( $\pm 0.40$ ) <sup>a</sup> | 20.24 ( $\pm 0.50$ ) <sup>a</sup> |
|                | D15         | 25.00 ( $\pm 0.99$ ) <sup>a</sup> | 21.00 ( $\pm 1.29$ ) <sup>a</sup> |

Abbreviations: Ct, cycle threshold values; D0, day zero; D1, day one; D7, day seven; D15, day fifteen; FW-BW, transfer from freshwater to brackish water; BW-FW, transfer from brackish water to freshwater.
